# Supplementary material for: High-performance transistors for bioelectronics through tuning of channel thickness
Source: PubMed Central journal article supplement — Sci Adv. 2015 May 22;1(4):e1400251. doi: 10.1126/sciadv.1400251 (PMC4640642; doi:10.1126/sciadv.1400251), 2015-05-22
Supplement: 1400251_SM.pdf [file 1400251_SM.pdf]

## Supplementary Materials for **High-performance transistors for bioelectronics through tuning of channel thickness**

Jonathan Rivnay, Pierre Leleux, Marc Ferro, Michele Sessolo, Adam Williamson, Dimitrios A. Koutsouras,  
Dion Khodagholy, Marc Ramuz, Xenofon Strakosas, Roisin M. Owens, Christian Benar,  
Jean-Michel Badier, Christophe Bernard, George G. Malliaras

Published 22 May 2015, *Sci. Adv.* **1**, e1400251 (2015)  
DOI: 10.1126/sciadv.1400251

### **This PDF file includes:**

- Fig. S1. Impedance spectroscopy.
- Fig. S2. Thickness dependence of capacitance.
- Fig. S3. Device characteristics of typical OECT.
- Fig. S4. Determination of hole mobility from drain current transients.
- Table S1. Hole mobility values for OECTs of different geometry.

## Supplementary Materials

### H3: Model for volumetric OECT operation

Here we introduce the notion of volumetric capacitance in the OECT model by Bernardis and Malliaras (*I*). We start with Ohm's law applied to the channel:

$$I_D = W \cdot d \cdot e \cdot \mu \cdot p(x) \cdot [dV(x)/dx] \quad (\text{S1})$$

where  $\mu$  is the hole mobility and  $p(x)$  is the hole density, given by:

$$p(x) = SO_3^- - M^+(x) \quad (\text{S2})$$

where  $SO_3^-$  is the density of sulfonate groups that are compensated with holes in pristine PEDOT:PSS and  $M^+(x)$  is the density of cations that enter the channel when a positive gate bias is applied. Treating the channel as a volumetric capacitor, we can write:

$$M^+(x) = (C^*/e) \cdot [V_G - V(x)]. \quad (\text{S3})$$

Substituting Equations S2 and S3 in S1 and integrating over the length of the channel, we get an expression for the drain current:

$$I_D = (W \cdot d/L) \cdot \mu \cdot C^* \cdot [V_T - V_G + V_D/2] \cdot V_D \quad (\text{S4})$$

where  $V_T = e \cdot SO_3^- / C^*$ . At saturation, which is achieved when  $V_D = V_G - V_T$ , the current is given by:

$$I_D^{SAT} = [W/(2 \cdot L)] \cdot d \cdot \mu \cdot C^* \cdot [V_T - V_G]^2 \quad (\text{S5})$$

The transconductance in the saturation regime is the first derivative of the above equation with respect to gate voltage.

## Impedance spectra and electrical characteristics of the OEETs

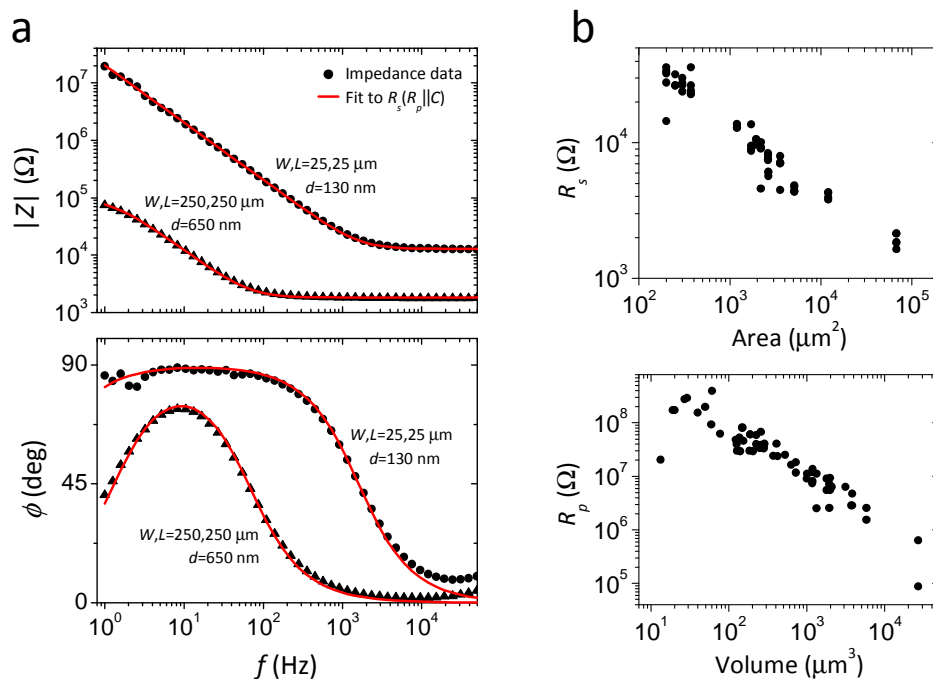

**Figure S1. Impedance spectroscopy. A.** Impedance spectra of two OEETs of different geometries, where the OEET is used as the working electrode with source and drain contacts connected to each other. Complex impedance data is fit to an  $R_s(R_p||C)$  equivalent circuit, which was found to adequately describe the frequency dependence for all channels explored in this work. The device that is nominally  $250 \times 250 \mu\text{m}^2$ , and 650 nm thick gives fit results of  $(R_s, R_p, C) = (1.82 \text{ k}\Omega, 94.8 \text{ k}\Omega, 1320 \text{ nF})$  and the  $25 \times 25 \mu\text{m}^2$ , 130 nm thick device yields values of  $(R_s, R_p, C) = (12.8 \text{ k}\Omega, 139 \text{ M}\Omega, 7.79 \text{ nF})$ . **B.** Scaling of the resistors with PEDOT:PSS film dimensions:  $R_s$  as a function of area, and  $R_p$  as a function of volume (obtained from Bode plot fits). It should be noted that the equivalent circuit provides a good fit to impedance data, but is not meant to describe transistor operation. The latter is described by the model outlined in the preceding paragraph.

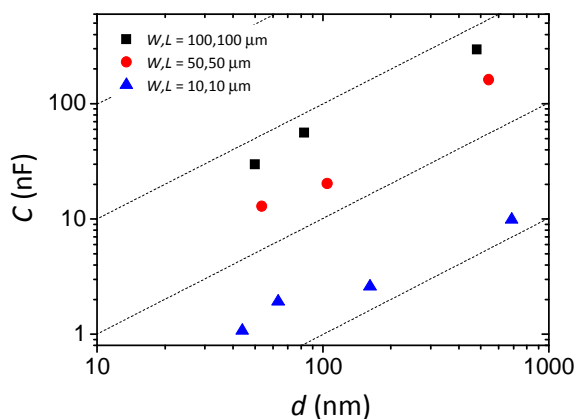

**Figure S2. Thickness dependence of capacitance.** Capacitance shown as a function of thickness for devices of different area.

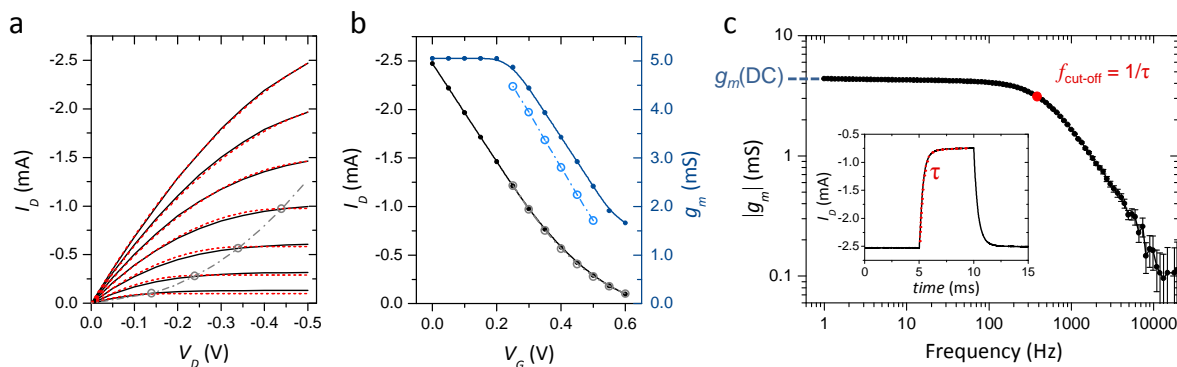

**Figure S3. Device characteristics of typical OEET.** **A.**  $I_D$ - $V_D$  characteristics of a nominally  $50 \times 50 \mu\text{m}^2$ , 500 nm thick device (black lines),  $V_G = 0$  to 0.6 V (top to bottom), with the corresponding fit to Suppl. Equation S4 and S5. Grey circles are the saturation values. **B.** Transfer ( $I_D$ - $V_G$ ) characteristics, and corresponding transconductance (blue) at  $V_D = -0.5$  V, and at  $V_D^{SAT}$  for each gate voltage (open symbols, dashed line). **c.** Small signal transconductance frequency response, with labeled steady-state transconductance and -3 dB frequency cut-off value. Inset: transient response of drain current to a 5 ms  $V_G = 0.4$  V pulse, for  $V_D = -0.5$  V. The dotted red line is an exponential fit to extract the rise time,  $\tau = 320 \mu\text{s}$ .

### H3: Hole mobility in PEDOT:PSS

Hole mobility was obtained in a sample of OEETs by sourcing gate current  $I_G$  and measuring the drain current transient for  $V_D = -0.1$  V. It has been shown that  $\partial I_D / \partial t = -I_G / \tau_h$ , where  $\tau_h$  is the time-of-flight of holes across the channel. (I) The data are shown in Fig. S4 and are tabulated in Table S1. The average value of hole mobility obtained is  $1.9 \pm 1.3 \text{ cm}^2/\text{V}\cdot\text{s}$ .

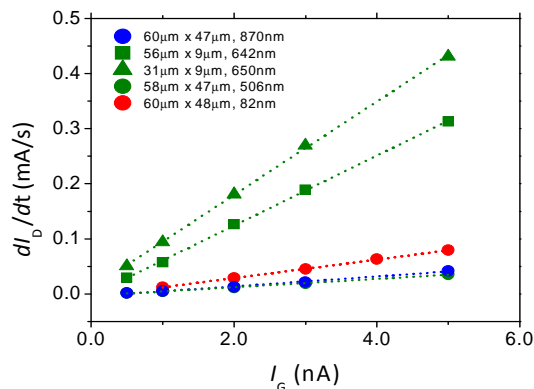

**Figure S4. Determination of hole mobility from drain current transients.**  $dI_D/dt$  determined from the change in the drain current upon the application of a gate current for transistors of different geometry.

**Table S1. Hole mobility values for OECTs of different geometry.** Channel dimensions correspond to measured (as opposed to nominal) values.

| $W$ ( $\mu\text{m}$ ) | $L$ ( $\mu\text{m}$ ) | $d$ (nm) | $\tau_h$ ( $\mu\text{s}$ ) | $\mu$ ( $\text{cm}^2/\text{Vs}$ ) |
|-----------------------|-----------------------|----------|----------------------------|-----------------------------------|
| 60                    | 47                    | 870      | 110                        | 2.0                               |
| 31                    | 9                     | 650      | 12                         | 0.9                               |
| 56                    | 9                     | 642      | 16                         | 0.6                               |
| 58                    | 47                    | 506      | 130                        | 2.1                               |
| 60                    | 48                    | 82       | 60                         | 3.8                               |
